# Supplementary material
Source: Springer Nature journal article supplement (https://www.springermedizin.de/resource/supplementary/13221_2011_19_MOESM8_ESM.pdf/9680778)

# Hey1

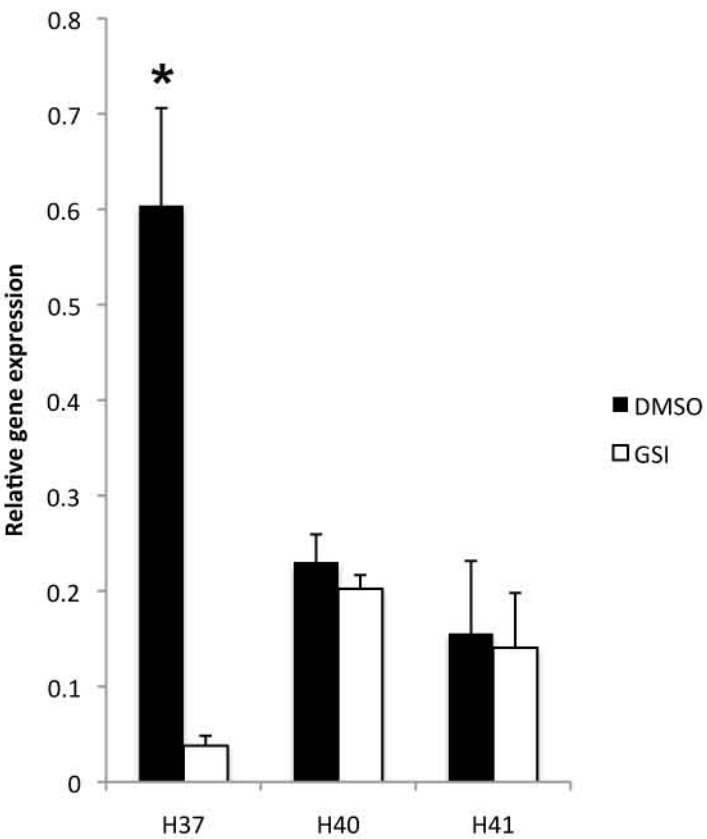

# HeyL

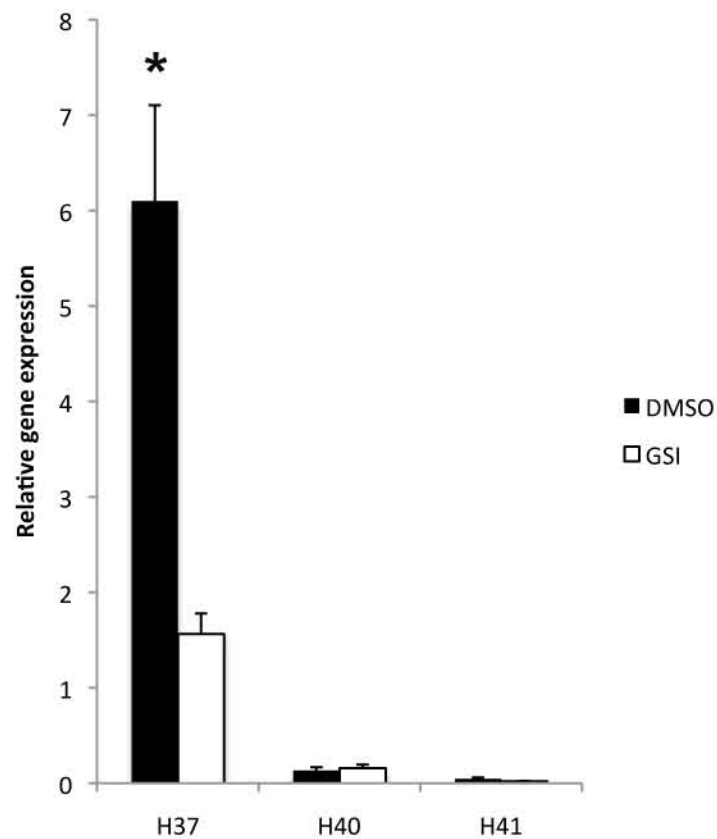

# Hes1

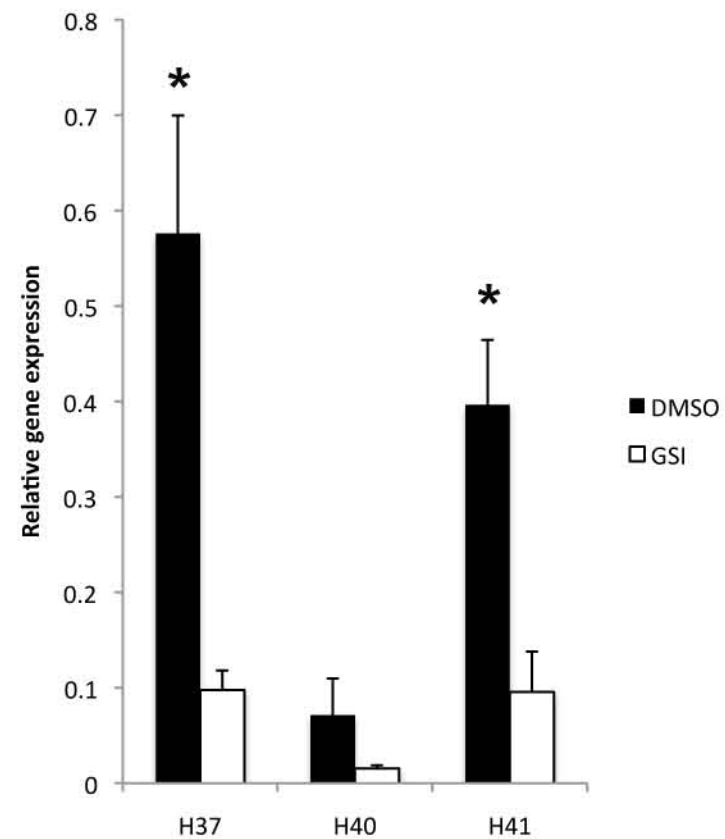

Supplement: MOESM8 [file 9680778]
